# Supplementary material
Source: MDPI journal article supplement (https://www.mdpi.com/2076-3417/11/22/10820)
Supplement: s1 [file s1]

Table S1. Physico-chemical parameters of sausages “cacciatore” standard dough. The pH and  $a_w$  values are expressed as mean  $\pm$  standard deviation (SD).

| Sampling (days) | pH value      | $a_w$ value    |
|-----------------|---------------|----------------|
| 1               | 5.8           | 0.96           |
| 3               | 5.4 $\pm$ 0.2 | 0.95           |
| 8               | 5.3           | 0.93 $\pm$ 0.1 |
| 17              | 5.4 $\pm$ 0.1 | 0.89           |
| 21              | 5.4 $\pm$ 0.3 | 0.87 $\pm$ 0.2 |
| 28              | 5.1 $\pm$ 0.1 | 0.84 $\pm$ 0.3 |

Table S2. Physico-chemical parameters in cooked ham. C - square slices (control) and PEC - square slices with plant extract added (10  $\mu$ l/g). The pH and  $a_w$  values are expressed as mean  $\pm$  standard deviation (SD) of three determinations. ns means no statistical differences between PEC and C by t-test and ANOVA.

| Sampling (days) | PEC             |                 | C (control)          |                      |
|-----------------|-----------------|-----------------|----------------------|----------------------|
|                 | pH value        | $a_w$ value     | pH value             | $a_w$ value          |
| 1               | 6.02 $\pm$ 0.02 | 0.97            | 6.11 $\pm$ 0.01 (ns) | 0.97 $\pm$ 0.01 (ns) |
| 3               | 6.02 $\pm$ 0.01 | 0.97 $\pm$ 0.01 | 6.10 (ns)            | 0.97 (ns)            |
| 8               | 6.04 $\pm$ 0.02 | 0.96 $\pm$ 0.02 | 6.10 (ns)            | 0.97 $\pm$ 0.01 (ns) |
| 17              | 6.05 $\pm$ 0.04 | 0.97 $\pm$ 0.03 | 6.09 $\pm$ 0.01 (ns) | 0.96 $\pm$ 0.01 (ns) |
| 21              | 6.08            | 0.97 $\pm$ 0.01 | 6.07 $\pm$ 0.03 (ns) | 0.97 $\pm$ 0.02 (ns) |
| 28              | 6.11 $\pm$ 0.01 | 0.96 $\pm$ 0.01 | 6.06 $\pm$ 0.02 (ns) | 0.96 $\pm$ 0.02 (ns) |
